1 **17-Oxime ethers of oxidized ecdysteroid derivatives modulate oxidative stress in human brain**  
2 **endothelial cells and dose-dependently might protect or damage the blood-brain barrier**

3

4 Short title: **New semi-synthetic ecdysteroids increase or decrease BBB resistance to oxidative stress**

5

6 Máté Vágvölgyi<sup>1,#</sup>, Dávid Laczkó<sup>1,#</sup>, Ana Raquel Santa-Maria<sup>2,3</sup>, Fruzsina R. Walter<sup>2</sup>, Róbert Berkecz<sup>4</sup>, Mária Deli<sup>2</sup>,  
7 Gábor Tóth<sup>5</sup>, Attila Hunyadi<sup>\*,1,6</sup>

8

9 **1** Institute of Pharmacognosy, University of Szeged, H-6720 Szeged, Hungary, **2** Institute of Biophysics, Biological  
10 Research Centre, Szeged, H-6726 Hungary, **3** Wyss Institute for Biologically Inspired Engineering at Harvard  
11 University, Boston, MA 02115, USA, **4** Institute of Pharmaceutical Analysis, University of Szeged, H-6720 Hungary,  
12 **5** Department of Inorganic and Analytical Chemistry, NMR Group, Budapest University of Technology and  
13 Economics, H-1111 Budapest, Hungary, **6** Interdisciplinary Centre of Natural Products, University of Szeged, H-6720  
14 Szeged, Hungary

15

16 \* hunyadi.attila@szte.hu

17 **Abstract**

18 20-Hydroxyecdysone and several of its oxidized derivatives exert cytoprotective effect in mammals including  
19 humans. Inspired by this bioactivity of ecdysteroids, in the current study it was our aim to prepare a set of sidechain-  
20 modified derivatives and to evaluate their potential to protect the blood-brain barrier (BBB) from oxidative stress.  
21 Six novel ecdysteroids, including an oxime and five oxime ethers, were obtained through regioselective synthesis  
22 from a sidechain-cleaved calonysterone derivative **2** and fully characterized by comprehensive NMR techniques  
23 revealing their complete <sup>1</sup>H and <sup>13</sup>C signal assignments. Surprisingly, several compounds sensitized hCMEC/D3 brain  
24 microvascular endothelial cells to *tert*-butyl hydroperoxide (tBHP)-induced oxidative damage as recorded by  
25 impedance measurements. Compound **8**, containing a benzyloxime ether moiety in its sidechain, was the only one  
26 that exerted a protective effect in a higher, 10 μM dose, while at lower (10 nM – 1 μM) doses it promoted tBHP-  
27 induced cellular damage. Based on our results, 17-oxime ethers of oxidized ecdysteroids modulate oxidative stress  
28 of the BBB in a way that may point towards unexpected toxicity. Further studies are needed to evaluate any possible  
29 risk connected to dietary ecdysteroid consumption and CNS pathologies in which BBB damage plays an important  
30 role.

## 31 **Introduction**

32 Ecdysteroids are insect molting hormone analogs widespread in the Plant Kingdom, and they have  
33 attracted a significant interest due to their non-hormonal anabolic, cytoprotective, and vascular  
34 protective activity in mammals. Several recent clinical trials have set their focus on these compounds  
35 as potential therapeutic agents in the treatment of sarcopenia (NCT03021798, NCT03452488), or the  
36 frequently fatal respiratory deterioration in COVID-19 (NCT04472728).

37 20-Hydroxyecdysone (20E), the most abundant representative of this compound group, was previously  
38 found to exert neuroprotective activity in rodent models of cerebral ischemia/reperfusion [1, 2].  
39 Further, we have recently reported a set of three new, highly oxidized ecdysteroids to protect human  
40 brain endothelial cells from oxidative injury [3].

41 The chemical modification of lipids, proteins, and DNA by reactive oxygen species (ROS) can result in  
42 cellular and tissue damage, implicating oxidative stress in the pathogenesis of numerous diseases and  
43 injuries affecting almost every organ system. Although oxidative stress and its related disorders are  
44 more prevalent in older individuals, environmental factors such as air pollution and UV exposure can  
45 expedite the development of these conditions in people of all ages [4]. The impact of oxidative stress  
46 on neurodegenerative diseases is of significant interest, as it has been linked to the severity of disease  
47 pathology. Biomarkers such as peroxiredoxins and ubiquinone/ubiquinol are found to be elevated in  
48 individuals with Alzheimer's disease, Parkinson's disease, and amyotrophic lateral sclerosis, and are  
49 associated with cognitive impairment [4-6]. The blood-brain barrier (BBB) plays a crucial role in ROS-  
50 mediated injury and neurodegenerative diseases. This barrier is composed of endothelial cells that  
51 have a strong and dynamic interaction with the neighboring cells pericytes and astrocytes. The brain  
52 endothelial cells have a unique protection system and it controls the transport of substances in and  
53 out of the brain via tight junctions, transport pathways, and efflux proteins [7]. Given that ROS can  
54 affect brain endothelial cells and cause BBB disruption, it is crucial to explore whether compounds such

55 as, e.g., ecdysteroids, can provide protection to these cells, promoting BBB protection in the early  
56 stages of neurological diseases.

57 The cytoprotective effect of 20E is at least partly due to its ability to activate protein kinase B (Akt) [8].

58 In our previous studies on various ecdysteroids as activators of this kinase, we found that  
59 calonysterone (**1**), and particularly its side-chain cleaved derivative **2**, are more potent in this regard  
60 than 20E [9, 10].

61 Our previous studies on ecdysteroid oximes and oxime ethers revealed that poststerone, the side-  
62 chain cleaved derivative of 20E, can be transformed into 20-oximes and oxime ethers in a  
63 regioselective manner [11]. This opened way to a synthetic strategy to prepare ecdysteroid derivatives  
64 with a modified, nitrogen-containing side-chain.

65 Inspired by the neuro- and cerebrovascular protective activity of natural ecdysteroids against ROS, in  
66 this work it was our aim to prepare a set of sidechain-cleaved and oxime ether-containing sidechain-  
67 modified derivatives of calonysterone (**1**), and to evaluate the compounds' bioactivity as potential BBB  
68 protecting candidates.

## 69 **Results and discussion**

### 70 **Chemistry**

71 **Oxidative sidechain cleavage.** The regioselective oxidative cleavage between the 20,22-diol to  
72 eliminate the sterol side chain at the C-17 position of calonysterone **1** was carried out with the  
73 hypervalent iodine reagent (diacetoxyiodo)benzene (PIDA), which had been successfully used for the  
74 similar purpose in the case of 20-hydroxyecdysone [12]. According to our previous results, using this  
75 reagent leads to a significantly better yield than PIFA, a more aggressive oxidant [12]. Full conversion  
76 was achieved within an hour. After neutralization and evaporation of the solvent, normal-phase  
77 chromatography was used for purification; this was a more practical choice than reverse-phase

78 separation due to its higher loading capacity and milder solvent evaporation conditions. Outline of the  
79 reaction is shown in (Fig. 1).

80 (Figure 1)

81 **Fig 1.** Oxidative cleavage of the sterol sidechain of calonysterone (**1**).

82

83 Regioselective formation of 20-oxime or -oxime ether function. Previously, we reported that the 6-  
84 enone function of poststerone is relatively less reactive for oxime formation than its 17-oxo group [13],  
85 therefore it was postulated that a similar regioselective oximation should be straightforward also for  
86 compound **2**.

87 At first, we performed small-scale (with approx. 10 mg of substrate) test reactions monitored by TLC  
88 in every 10 minutes, and we found that all reactions reached full conversion within 40 minutes. Our  
89 experiments included the use of either pyridine or ethanol as solvent, and our experience showed that  
90 the reactions proceeded in both solvents with nearly identical results. Therefore, we chose ethanol  
91 considering its lower boiling point that makes it easier to evaporate during the work-up. After the  
92 transformations, the solvent was evaporated on a rotary vacuum evaporator and liquid-liquid  
93 extraction was performed with water and ethyl acetate. Outline of the synthesis and structure of the  
94 products is shown in (Fig 2).

95 (Figure 2)

96 **Fig 2.** Synthesis of oxime (**3**) and oxime ether (**4–8**) derivatives of compound **2**.

97

98 Following this strategy, a total of six new ecdysteroid C-20 oxime and oxime ether derivatives were  
99 synthesized from larger-scale aliquots of compound **2**. After pre-purification of the synthesized  
100 materials, their HPLC chromatograms were recorded, which was accompanied by the mapping of the

101 eluent systems for their preparative RP-HPLC purification. To improve sample solubility for preparative  
102 RP-HPLC, a 3:7 (v/v) ratio solvent mixture of dimethyl sulfoxide (DMSO) and acetonitrile was used.

103 **Structure elucidation.** We have recently reported the structure elucidation and complete  $^1\text{H}$  and  $^{13}\text{C}$   
104 signal assignment of compound **1** [9] and the sidechain-cleaved calonysterone derivative **2** [12].  
105 Structure elucidation of the new compounds **3–8** (Fig 2) was performed based on the molecular  
106 formulas obtained by HRMS and on detailed NMR studies. HRMS data obtained verified that our  
107 synthetic oximation procedure was regioselective in each case, and the reaction took place at either  
108 the 6- or 20-carbonyl groups of the substrate. The location and identity of the newly formed functions  
109 was determined by means of comprehensive one- and two-dimensional NMR methods using widely  
110 accepted strategies [14, 15].

111  $^1\text{H}$  NMR,  $^{13}\text{C}$  DeptQ, edHSQC, HMBC, one-dimensional selective ROESY (Rotating frame Overhauser  
112 Enhancement Spectroscopy) spectra ( $\tau_{\text{mix}}$ : 300ms) were utilized to achieve complete  $^1\text{H}$  and  $^{13}\text{C}$  signal  
113 assignment. It is worth mentioning that due to the molecular mass of compounds **3–8** (374–464 Da)  
114 the signal/noise value of the selective ROE experiments strongly exceeds that of the selective NOEs.  
115  $^1\text{H}$  assignments were accomplished using general knowledge of chemical shift dispersion with the aid  
116 of the  $^1\text{H}$ - $^1\text{H}$  coupling pattern.  $^1\text{H}$  and  $^{13}\text{C}$  chemical shifts (600 and 150 MHz, respectively), multiplicities  
117 and coupling constants of compounds **3–8** are compiled in (Table 1). Since the stereostructure of the  
118 steroid frame is identical within these compounds, we described the multiplicity and  $J$  coupling  
119 constants only for **3**. The characteristic NMR (Fig. S1–S20) and HRMS (Fig. S21–S20) spectra of  
120 compounds **3–8** are presented as Supporting Information. To facilitate the understanding of the  $^1\text{H}$  and  
121  $^{13}\text{C}$  signal assignments, the compounds' structures are also depicted on the spectra.

122 Only one set of signals appeared in the  $^1\text{H}$  and  $^{13}\text{C}$  NMR spectra of each compound, indicating that the  
123 regioselective oximation led to the isolation of one stereoisomer for each. The measured  $\Delta\delta$  55 ppm  
124 diamagnetic change of  $\delta_{\text{C-20}}$  (211  $\rightarrow$  156 ppm) supported the  $\text{C=O} \rightarrow \text{C=NOR}$  conversion [11]. During  
125 the NMR study of isomeric Z/E 6-oxime derivatives of 20-hydroxyecdysone 2,3;20,22-diacetonide the

126 chemical shift of  $\alpha$  carbon atoms ( $\delta_{C-5}$  and  $\delta_{C-7}$ ) in the syn position with respect to the oxime hydroxyl  
127 group exhibits a significant ( $\Delta\delta$  syn-anti  $\sim 5$  ppm) diamagnetic shift, which was successfully utilized for  
128 differentiation of (Z/E) isomers [16]. In the present case for compounds **3–8**, due to the absence of  
129 exact data of  $\Delta\delta$  syn-anti parameters for the C-21 and C-17 signals, the unambiguous identification of  
130 the E/Z isomerism in this way was not possible. To overcome this problem, we utilized a series of  
131 selective ROESY experiments on the CH<sub>3</sub>-21 signals (Fig. S1, S8 and S13), and the detected steric  
132 responses unequivocally proved the *E* configuration of the oxime moiety. By introducing the 1D selROE  
133 spectrum on H<sub>3</sub>-21 into the edited HSQC experiment (Fig. S3, S8 and S13), the ROE signals allowed  
134 identifying the corresponding C–H cross-peaks. The quaternary carbon signals were identified from the  
135 HMBC spectra, for which the HMBC responses over two and three bonds of H<sub>3</sub>-19, H<sub>3</sub>-18, and H<sub>3</sub>-21  
136 were very effective (Fig S4, S9 and S14).

137

138

139 **Table 1.**  $^1\text{H}$  and  $^{13}\text{C}$  chemical shifts, multiplicities and coupling constants of compounds **3–8** in  $\text{dms-}$   
 140  $d_6$ .

|            | 3 FP6NOH     |                      |                 | 4 FP6NOMe    |                 | 5 FP6NOEt    |                 | 6 FP6NOAlly  |                 | 7 FP6NOtBu   |                 | 8 FP6NOBn    |                 |
|------------|--------------|----------------------|-----------------|--------------|-----------------|--------------|-----------------|--------------|-----------------|--------------|-----------------|--------------|-----------------|
| no.        | $^1\text{H}$ | $J$ (Hz)             | $^{13}\text{C}$ | $^1\text{H}$ | $^{13}\text{C}$ | $^1\text{H}$ | $^{13}\text{C}$ | $^1\text{H}$ | $^{13}\text{C}$ | $^1\text{H}$ | $^{13}\text{C}$ | $^1\text{H}$ | $^{13}\text{C}$ |
| 1 $\beta$  | 2.29         | dd; 14.0;2.9         | 41.7            | 2.28         | 41.7            | 2.28         | 41.7            | 2.28         | 41.7            | 2.29         | 41.7            | 2.28         | 41.7            |
| $\alpha$   | 1.27         | dd; 14.0;3.3         |                 | 1.25         |                 | 1.26         |                 | 1.28         |                 | 1.26         |                 | 1.25         |                 |
| 2          | 3.84         |                      | 68.3            | 3.84         | 68.4            | 3.83         | 68.3            | 3.83         | 68.3            | 3.83         | 68.3            | 3.83         | 68.3            |
| 3          | 3.33         |                      | 72.2            | 3.33         | 72.3            | 3.33         | 72.2            | 3.35         | 72.2            | 3.33         | 72.2            | 3.35         | 72.2            |
| 4 $\beta$  | 2.37         | t; 12.1              | 27.0            | 2.37         | 27.1            | 2.37         | 27.0            | 2.37         | 27.0            | 2.37         | 27.0            | 2.37         | 27.0            |
| $\alpha$   | 2.92         | ddd;<br>12.1;4.8;1.2 |                 | 2.92         |                 | 2.92         |                 | 2.92         |                 | 2.92         |                 | 2.92         |                 |
| 5          |              |                      | 133.1           |              | 133.2           |              | 133.1           |              | 133.1           |              | 133.1           |              | 133.2           |
| 6          |              |                      | 142.8           |              | 142.9           |              | 142.8           |              | 142.8           |              | 142.8           |              | 142.8           |
| 7          |              |                      | 179.6           |              | 179.6           |              | 179.5           |              | 179.5           |              | 179.5           |              | 179.5           |
| 8          |              |                      | 123.1           |              | 123.2           |              | 123.1           |              | 123.1           |              | 123.1           |              | 123.1           |
| 9          |              |                      | 164.3           |              | 164.4           |              | 164.3           |              | 164.3           |              | 164.2           |              | 164.3           |
| 10         |              |                      | 41.1            |              | 41.2            |              | 41.1            |              | 41.1            |              | 41.1            |              | 41.1            |
| 11 $\beta$ | 2.52         |                      | 24.0            | 2.52         | 24.1            | 2.53         | 24.0            | 2.52         | 24.0            | 2.54         | 24.0            | 2.50         | 24.0            |
| $\alpha$   | 2.63         | ddd;<br>19.0;5.0;~1  |                 | 2.63         |                 | 2.63         |                 | 2.63         |                 | 2.63         |                 | 2.61         |                 |
| 12 $\beta$ | 2.08         |                      | 34.9            | 2.06         | 34.9            | 2.06         | 34.8            | 2.06         | 34.8            | 2.07         | 34.9            | 2.03         | 34.8            |
| $\alpha$   | 1.53         | td; 12.5;5.0         |                 | 1.51         |                 | 1.52         |                 | 1.52         |                 | 1.53         |                 | 1.51         |                 |
| 13         |              |                      | 46.5            |              | 46.7            |              | 46.6            |              | 46.7            |              | 46.6            |              | 46.7            |
| 14         |              |                      | 140.2           |              | 140.2           |              | 141.0           |              | 140.1           |              | 140.1           |              | 140.1           |
| 15         | 6.79         | t; 2.7               | 126.3           | 6.78         | 126.2           | 6.78         | 126.2           | 6.78         | 126.1           | 6.78         | 126.2           | 6.77         | 126.1           |
| 16 $\beta$ | 2.93         |                      | 32.7            | 2.90         | 32.6            | 2.91         | 32.6            | 2.90         | 32.5            | 2.96         | 32.7            | 2.90         | 32.5            |
| $\alpha$   | 2.26         | ddd;<br>16.9;7.5;~3  |                 | 2.26         |                 | 2.26         |                 | 2.26         |                 | 2.29         |                 | 2.29         |                 |
| 17         | 2.57         | dd; 10.6;7.5         | 55.9            | 2.57         | 55.5            | 2.57         | 55.5            | 2.58         | 55.5            | 2.58         | 55.9            | 2.58         | 55.5            |
| 18         | 0.68         |                      | 18.3            | 0.68         | 17.3            | 0.69         | 17.3            | 0.63         | 17.3            | 0.68         | 17.3            | 0.63         | 17.3            |
| 19         | 1.40         |                      | 27.3            | 1.38         | 27.3            | 1.40         | 27.2            | 1.39         | 27.2            | 1.40         | 27.2            | 1.39         | 27.2            |
| 20         |              |                      | 154.8           |              | 156.6           |              | 156.1           |              | 156.7           |              | 154.2           |              | 157.1           |
| 21         | 1.81         |                      | 15.1            | 1.82         | 15.7            | 1.83         | 15.7            | 1.88         | 15.7            | 1.81         | 15.7            | 1.88         | 15.9            |
| 22         |              |                      |                 | 3.76         | 61.1            | 4.01         | 68.27           | 4.51         | 73.7            |              | 77.2            | 5.05         | 74.8            |
| 23         |              |                      |                 |              |                 | 1.17         | 14.9            | 5.95         | 135.2           | 1.23         | 27.7            |              | 138.6           |
| 24         |              |                      |                 |              |                 |              |                 | 5.24<br>5.16 | 116.9           | 1.23         | 27.7            | 7.34         | 128.0           |
| 25         |              |                      |                 |              |                 |              |                 |              |                 | 1.23         | 27.7            | 7.34         | 128.4           |
| 26         |              |                      |                 |              |                 |              |                 |              |                 |              |                 | 7.27         | 127.7           |
| 27         |              |                      |                 |              |                 |              |                 |              |                 |              |                 | 7.34         | 128.4           |
| 28         |              |                      |                 |              |                 |              |                 |              |                 |              |                 | 7.34         | 128.0           |
| HO-2       |              | d; 2.9               |                 | 3.84         |                 |              |                 |              |                 |              |                 |              |                 |
| HO-3       |              | d; 5.6               |                 | 4.95         |                 |              |                 |              |                 |              |                 |              |                 |

141

142



143 **Biology**

144 We evaluated the effect of the compounds on the viability and barrier integrity of human brain  
145 microvascular endothelial cells (hCMEC/D3) using impedance measurements. Initially, we tested  
146 concentration ranges of 0.01–10  $\mu$ M for all compounds, and no notable changes in cell viability were  
147 observed, except for compounds **3**, **4** and **8** (Supporting Information, Fig S27). Although we monitored  
148 all concentrations for 24 hours, we observed that the effect of all compounds starts occurring at the  
149 4-hour time point. Therefore, we have focused our results on the 4h timepoint. For compound **3** we  
150 could observe a significant cell index decrease for 10  $\mu$ M concentration, however, for compound **4** a  
151 significant increase for 1  $\mu$ M concentration was observed (Supporting Information, Fig S27). Notably,  
152 compound **8** exhibited the highest and most significant activity. At concentrations of 0.01, 0.1, 1, and  
153 10  $\mu$ M, it demonstrated a positive effect on barrier integrity. As compound **8** demonstrated the highest  
154 activity, we decided to investigate whether it also promotes a protective effect against oxidative stress.  
155 Excessive ROS resulting from oxidative stress can cause disruption of the BBB by compromising the  
156 antioxidant defense system. The damaging effects of ROS on cellular components such as proteins,  
157 lipids, and DNA can lead to the modulation of tight junctions, activation of matrix metalloproteinases,  
158 and upregulation of inflammatory molecules, all of which can contribute to BBB damage [17]. Tert-  
159 butyl hydroperoxide is known to induce cellular damage by generating high levels of ROS [18].  
160 Therefore, to assess the protective effects of the compound against ROS-induced damage, we treated  
161 cells with tBHP (350  $\mu$ M) alone or in combination with 0.01, 0.1, 1 and 10  $\mu$ M of compound **8**. We  
162 identified the optimal concentration of tBHP by testing different concentrations and selecting 350  $\mu$ M,  
163 which did not decrease the cell index below ~50% in our previous work. This concentration was then  
164 used for the cell viability assay.

165 (Figure 3)

166 **Fig 3.** The effects of compound **8** at concentrations of 0.01, 0.1, 1, and 10  $\mu$ M treatment on human  
167 brain microvascular endothelial cells (hCMEC/D3) were evaluated using impedance-based assays to

168 assess cell viability and barrier integrity in the absence and presence of oxidative stress promoted by  
169 tert-butyl hydroperoxide (tBHP). **A:** Time-dependent impact of **8** on cell viability following co-  
170 treatment with tBHP (350  $\mu$ M). **B:** Impact of **8** on cell viability at 4 hours co-treatment with tBHP (350  
171  $\mu$ M). **C:** Impact of **8** on cell viability at 24 hours co-treatment with tBHP (350  $\mu$ M). The data are  
172 presented as the mean  $\pm$  standard deviation (SD) and were obtained from a minimum of two  
173 independent experiments (n = 2–3) with 3–9 technical replicates. Data analysis was performed using  
174 one-way analysis of variance (ANOVA) followed by Dunnett’s multiple comparisons test. The results  
175 were statistically significant with \*p < 0.05, \*\*\*\*p < 0.0001, compared to the control group, and #####p  
176 < 0.0001, compared to the tBHP group.

177

178 We can observe a significant decrease in cell viability by a total of ca. 60% in the presence of tBHP  
179 compared to the control group (Fig 3B–C), indicating tBHP-induced oxidative damage on the cells.  
180 Treatment of 10  $\mu$ M of compound **8** resulted in a significant and steady increase of cell impedance,  
181 i.e., it was able to protect the cells efficiently from the harmful effects of tBHP. These findings suggest  
182 that the compound might have a protective effect against cellular damage induced by ROS (Fig 3B and  
183 3C). However, at smaller, 10 nM, 100 nM, and 1  $\mu$ M concentrations a surprising opposite effect was  
184 observed. In the lower concentrations and with at least 6h incubation, compound **8** dramatically  
185 increased tBHP-induced toxicity, leading to a nearly complete disruption of the cellular layer (Fig 3C).  
186 We also tested compounds **4** and **6** (3 and 10  $\mu$ M) in combination with 350  $\mu$ M of tBHP, and both  
187 significantly increased oxidative damage at these concentrations (Supporting Information, Fig S28).

188 The use of impedance-based monitoring to assess brain endothelial cell function is crucial as it not only  
189 measures the number of viable cells but also provides valuable information on the integrity of the cell  
190 layer and the extent of barrier damage. This method has been shown to be relevant to evaluate barrier  
191 integrity and the overall health of brain endothelial cells [3, 19, 20]. There is evidence indicating that  
192 oxidative stress plays a crucial role in the induction of BBB damage [7]. The present study provided

193 evidence that treatment with tBHP resulted in brain endothelial damage, which was manifested by a  
194 decrease in cell and barrier integrity in certain concentrations of the compounds tested. However, co-  
195 treatment with compound **8** significantly altered this effect, leading to the prevention or promotion of  
196 oxidative barrier damage. During the 24h-long monitoring of the cell index, a clear concentration-  
197 dependent distinction could be made between the protective or damaging effect. To this end, no data  
198 are available on the pharmacokinetics of compound **8**, hence it is not possible to evaluate if a 10  $\mu$ M  
199 plasma level at the BBB is achievable or not. On the other hand, the low-concentration effect of  
200 compound **8** to sensitize the BBB to oxidative stress clearly raises a warning concerning its value as a  
201 lead compound.

202 In the broader context, it may be worth stressing that the herein reported compounds are semi-  
203 synthetic ecdysteroids that contain oxime ether moieties in their sidechain. This functional group is  
204 not expectable to occur in natural ecdysteroids or their metabolites, therefore our results do not  
205 directly imply any risk connected to phytoecdysteroid consumption. In our previous study on minor  
206 phytoecdysteroids [3], only protective effects were observed. Nevertheless, considering that hardly  
207 anything is known about ecdysteroids' bioactivity in relation with the BBB, further studies are needed  
208 to evaluate related drug discovery potential and/or risks of this compound family.

209

## 210 **Experimental**

### 211 **Materials and methods**

212 **Chemistry.** All solvents and reagents were purchased from Sigma-Aldrich (Merck KGaA, Darmstadt,  
213 Germany) and were used without any further purification. The progress of the reactions was  
214 monitored by thin layer chromatography (TLC) on Kieselgel 60F254 silica plates purchased from Merck  
215 (Merck KGaA, Darmstadt, Germany). The examination of the plates was carried out under UV  
216 illumination at 254 and 366 nm.

217 The purification of calonysterone was performed by centrifugal partition chromatography on a 250 ml  
218 Armen Spot instrument (Gilson Inc., Middleton, WI, USA). The flash chromatographic purification of  
219 compound **2** was carried out on a Combiflash Rf+ instrument (Teledyne ISCO, Lincoln, NE, USA)  
220 equipped with diode array and evaporative light scattering detection (DAD-ELSD), and commercially  
221 available prefilled RediSep columns (Teledyne ISCO, Lincoln, NE, USA) were utilized. For the analysis of  
222 the compounds, we used a dual-pump Jasco HPLC instrument (Jasco International Co. Ltd., Hachioji,  
223 Tokyo, Japan) equipped with an “MD-2010 Plus” PDA detector. The analytical-scale separations were  
224 performed on a Phenomenex Kinetex Biphenyl 100A 5 $\mu$  250x4.6 mm (Torrence, CA, USA) HPLC column.  
225 The separation of compound 4–8 was performed on an Armen “Spot Prep II” preparative  
226 chromatographic apparatus (Gilson Inc., Middleton, WI, USA) equipped with a dual-wavelength UV  
227 detector and four individual solvent pumps. The RP-HPLC purification of the ecdysteroid products was  
228 carried out with adequately chosen isocratic eluent mixtures of acetonitrile and water.

229 **Isolation of calonysterone (1).** A commercially available extract prepared from *Cyanotis arachnoidea*  
230 roots was purchased from Xi’an Olin Biological Technology Co., Ltd. (Xi’an, China) [21], and subjected  
231 to a chromatographic purification to obtain the starting material calonysterone (**1**) as published before  
232 [22]. Briefly, 5.46 kg of extract was percolated with 15.5 L of methanol, and after evaporation of the  
233 solvent, the dry residue (700 g) was subjected to further separation by a multi-step chromatographic  
234 fractionation through silica gel. The final purification of **1** was carried out using centrifugal partition  
235 chromatography in ascending mode with a biphasic solvent system of *n*-hexane – ethyl acetate –  
236 methanol – water (1:5:1:5, v/v/v/v) [22].

237 **Preparation of compound 2 via the oxidative side-chain cleavage of calonysterone (1).** An aliquot of  
238 2 g of calonysterone (**1**) was dissolved in 500 ml of methanol. One equivalent (1.34 g) of PIDA was  
239 added, and the reaction mixture was stirred for 60 minutes at room temperature. The solution was  
240 then neutralized with 10% aq. NaHCO<sub>3</sub>, and the solvent was evaporated under reduced pressure on a  
241 rotary evaporator. Subsequently, the residue was re-dissolved in acetone and adsorbed on 10 g of

242 silica gel for dry loading. The product was purified by flash chromatography on a 24 g silica column  
243 (flow rate 35 ml/min, run time: 60 min) with a gradient of dichloromethane (A) and methanol (B), from  
244 0% to 15% of solvent B in A. The separation afforded compound **2** in a yield of 45.5%.

245 **General Procedure for the synthesis of sidechain cleaved calonysterone 20-oxime and oxime ether**  
246 **derivatives 3–8.** A 120 mg aliquot of compound **2** (0,34 mmol) was dissolved in ethanol (20 ml) and  
247 depending on the functional group to be coupled, 120 mg of hydroxylamine hydrochloride (compound  
248 **3**) or alkoxyamine hydrochloride (compounds **4–8**) was added to the solution under stirring. After 40  
249 minutes of stirring at 80°C the solution was evaporated to dryness under reduced pressure. After water  
250 addition to the dry residue (100 ml), the aqueous solution was extracted three times with ethyl acetate  
251 (3x100 ml) and the combined organic phase was dried over anhydrous Na<sub>2</sub>SO<sub>4</sub>. Subsequently, the  
252 solution was filtered, and the solvent was evaporated under reduced pressure. The purification of the  
253 mixture was implemented by preparative RP-HPLC to afford the corresponding ecdysteroid product.

254 **Procedures for structure elucidation of the obtained products.** HR-MS analysis of the compounds was  
255 carried out on an Agilent 1100 LC-MS instrument (Agilent Technologies, Santa Clara, CA, USA) coupled  
256 with Thermo Q-Exactive Plus orbitrap spectrometer (Thermo Fisher Scientific, Waltham, MA, USA)  
257 used in positive ionization mode. Regarding the samples, 100 µg/ml solutions were prepared with  
258 acetonitrile solvent containing 0.1% formic acid.

259 <sup>1</sup>H NMR, <sup>13</sup>C DeptQ, edHSQC, HMBC, and one-dimensional selective ROESY spectra (τ<sub>mix</sub>: 300ms) were  
260 recorded at 295 K on a Bruker Avance III HD 600 (Billerica, MA, USA; 600 and 150 MHz for <sup>1</sup>H and <sup>13</sup>C  
261 NMR spectra, respectively) spectrometer equipped with a Prodigy cryo-probehead. The pulse  
262 programs were taken from the Bruker software library (TopSpin 3.5). <sup>1</sup>H assignments were  
263 accomplished using general knowledge of chemical shift dispersion with the aid of the <sup>1</sup>H-<sup>1</sup>H coupling  
264 pattern (<sup>1</sup>H NMR spectra). DMSO-*d*<sub>6</sub> were used as the solvent and tetramethylsilane (TMS) as the  
265 internal standard and amounts of approximately 1–5 mg of compound was dissolved in 0.1 ml of  
266 solvent and transferred to 2.5 mm Bruker MATCH NMR sample tube (Bruker). Chemical shifts (δ) and

267 coupling constants ( $J$ ) are given in ppm and in Hz, respectively. To facilitate the understanding of the  
268  $^1\text{H}$  and  $^{13}\text{C}$  signal assignments, the structures are also depicted on the spectra (Supporting Information,  
269 Fig S1–S20).

270 **Compound 3:** off-white, solid; isolated yield: 49.4 mg (39.5%); RP-HPLC purity: 98.1%; for  $^1\text{H}$  and  $^{13}\text{C}$   
271 NMR data, see Table 1 and Supplementary Fig. S1–S4; HR-MS:  $\text{C}_{21}\text{H}_{27}\text{NO}_5$ ,  $[\text{M}+\text{H}]^+$  Calcd.: 374.19730,  
272 found: 374.19696 (Fig S21).

273 **Compound 4:** off-white, solid; isolated yield: 33.1 mg (25.5%); RP-HPLC purity: 99.1%; for  $^1\text{H}$  and  $^{13}\text{C}$   
274 NMR data, see Table 1 and Supplementary Fig. S5–S9; HR-MS:  $\text{C}_{22}\text{H}_{29}\text{NO}_5$ ,  $[\text{M}+\text{H}]^+$  Calcd.: 388.21185,  
275 found: 388.21208 (Fig S22).

276 **Compound 5:** off-white, solid; isolated yield: 50.6 mg (37.7%); RP-HPLC purity: 98.0%; for  $^1\text{H}$  and  $^{13}\text{C}$   
277 NMR data, see Table 1, and Supplementary Fig. S10–S14; HR-MS:  $\text{C}_{23}\text{H}_{31}\text{NO}_5$ ,  $[\text{M}+\text{H}]^+$  Calcd.: 402.22750,  
278 found: 402.22795 (Fig S23).

279 **Compound 6:** off-white, solid; isolated yield: 52.1 mg (37.7%); RP-HPLC purity: 98.9%; for  $^1\text{H}$  and  $^{13}\text{C}$   
280 NMR data, see Table 1, and Supplementary Fig. S15–S16; HR-MS:  $\text{C}_{24}\text{H}_{31}\text{NO}_5$ ,  $[\text{M}+\text{H}]^+$  Calcd.:  
281 414.22750, found: 414.22808 (Fig S24).

282 **Compound 7:** off-white, solid; isolated yield: 27.8 mg (19.4%); RP-HPLC purity: 97.4%; for  $^1\text{H}$  and  $^{13}\text{C}$   
283 NMR data, see Table 1, and Supplementary Fig. S17–S18; HR-MS:  $\text{C}_{25}\text{H}_{35}\text{NO}_5$ ,  $[\text{M}+\text{H}]^+$  Calcd.: 430.25880,  
284 found: 430.25890 (Fig S25).

285 **Compound 8:** off-white, solid; isolated yield: 54.9 mg (35.3%); RP-HPLC purity: 97.1%; for  $^1\text{H}$  and  $^{13}\text{C}$   
286 NMR data, see Table 1, and Supplementary Fig. S19–S20; HR-MS:  $\text{C}_{28}\text{H}_{33}\text{NO}_5$ ,  $[\text{M}+\text{H}]^+$  Calcd.: 464.24315,  
287 found: 464.24351 (Fig S26).

288

289 **Biology**

290 **Human brain microvascular endothelial cell line (hCMEC/D3) as a blood-brain barrier cell culture**  
291 **model.** The hCMEC/D3 human brain microvascular endothelial cell line was obtained from Merck  
292 Millipore (Germany). To maintain the cells' brain endothelial-like features, we used cells under passage  
293 number 35 [23]. Cells were grown in dishes coated with rat tail collagen and maintained in an incubator  
294 at 37°C with 5% CO<sub>2</sub>. The basal medium used was MCDB 131 (Pan Biotech, Germany) supplemented  
295 with 5% fetal bovine serum, GlutaMAX (100 ×, Life Technologies, USA), lipid supplement (100 ×, Life  
296 Technologies, USA), 10 µg/ml ascorbic acid, 550 nM hydrocortisone, 37.5 µg/ml heparin, 1 ng/ml basic  
297 fibroblast growth factor (Roche, USA), 5 µg/ml insulin, 5 µg/ml transferrin, 5 ng/ml selenium  
298 supplement (100x, PanBiotech), 10 mM HEPES, and gentamycin (50 µg/ml). We changed the medium  
299 every two or three days. When the cultures reached almost 90% confluence, we passaged them to rat  
300 tail collagen-coated 96-well plates (E-plate, Agilent, USA) for viability assays. Before each experiment,  
301 the medium was supplemented with 10 mM LiCl for 24 hours to improve BBB properties [24].

302 **Impedance measurements for cell viability assays.** The viability of brain endothelial cells was assessed  
303 using real-time impedance measurement, which has been shown to correlate with cell number,  
304 adherence, growth, and viability [25]. The hCMEC/D3 cells were seeded in 96-well E-plates with golden  
305 electrodes at a density of 5×10<sup>3</sup> cells per well and incubated in a CO<sub>2</sub> incubator at 37°C for 5-6 days.  
306 The medium was changed every two days. Once the cells reached a stable growth plateau, they were  
307 treated with compounds **2–8** at concentrations ranging from 0.01 to 10µM, and their viability was  
308 monitored for 24 hours using RTCA-SP (Agilent). Triton X-100 was used to determine 100% toxicity.  
309 After 24-hours monitoring, we found that the compounds exhibited the highest level of activity after  
310 4-hours of treatment. As a result, we decided to focus our treatments at this time point.

311 **Preparation of stock and working solutions for the cellular assays.** The compounds were obtained as  
312 dry powder and stored at -20 °C until use. Stock solutions were prepared by diluting the compounds  
313 in DMSO to a final concentration of 10 mM and stored at -20 °C. Working solutions were freshly

314 prepared by diluting the stock solutions in cell culture medium to obtain a concentration range of 0.01–  
315 10  $\mu$ M.

316 **Induction of oxidative stress by tert-butyl hydroperoxide.** The oxidative compound tert-butyl  
317 hydroperoxide (tBHP) can cause cell death through apoptosis or necrosis by generating tert-butoxyl  
318 radicals via iron-dependent reactions. This results in lipid peroxidation, depletion of intracellular  
319 glutathione, and modification of protein thiols, leading to loss of cell viability [18, 26, 27]. To determine  
320 a concentration that would result in approximately 50% cell viability loss, various concentrations of  
321 tBHP were tested ranging from 1–1000  $\mu$ M in preliminary experiments [3]. Based on these results,  
322 350  $\mu$ M tBHP was found to be effective and was used in combination with the selected concentrations  
323 of the compounds to test for potential protective effects.

324 **Statistics.** The mean  $\pm$  SD values were used to present the data. The statistical significance between  
325 different treatment groups was assessed using one-way ANOVA, followed by Dunnett's multiple  
326 comparison post-tests (GraphPad Prism 9.0; GraphPad Software, USA). At least four parallel samples  
327 were used, and changes were considered statistically significant when  $p < 0.05$ .

## 328 **Conclusions**

329 In this study, we have prepared a sidechain cleaved, oxidized ecdysteroid and six of its oxime or oxime  
330 ether derivatives. Using a relevant *in vitro* cellular model for blood-brain barrier integrity, we  
331 demonstrated that the compounds have a significant impact on the oxidative stress-resistance of the  
332 BBB. At low doses, compound **8** increased t-BHP-induced cellular damage while at a higher  
333 concentration it acted as a protective agent. Our results raise a warning that semi-synthetic  
334 modifications of cytoprotective ecdysteroids may unexpectedly alter their bioactivity profile towards  
335 harmful effects on cerebrovascular endothelial cells, which may confer them a central nervous system  
336 toxicity. The significance of these findings concerning phytoecdysteroid consumption is yet unclear  
337 and requires further studies.



## 338 **Author Contributions**

339 Conceptualization: A.H., Data curation: A.R.S.M., F.R.W., G.T., Funding acquisition: A.H., F.R.W., M.D.,  
340 Investigation: M.V., D.L., A.R.S.M., F.R.W., R.B., G.T., Resources: M.D., G.T., A.H., Supervision: M.D.,  
341 A.H., Writing – original draft: M.V., D.L., G.T., A.H., writing – review & editing: D.L., A.R.S.M., F.R.W.,  
342 M.D., G.T., A.H.

## 343 **Conflicts of interest**

344 There are no conflicts to declare.

## 345 **References**

- 346 1. Hu J, Luo CX, Chu WH, Shan YA, Qian Z-M, Zhu G, et al. 20-Hydroxyecdysone Protects against  
347 Oxidative Stress-Induced Neuronal Injury by Scavenging Free Radicals and Modulating NF- $\kappa$ B and JNK  
348 Pathways. *PLOS ONE*. 2012;7(12):e50764. doi: 10.1371/journal.pone.0050764.
- 349 2. Wang W, Wang T, Feng WY, Wang ZY, Cheng MS, Wang YJ. Ecdysterone protects gerbil brain  
350 from temporal global cerebral ischemia/reperfusion injury via preventing neuron apoptosis and  
351 deactivating astrocytes and microglia cells. *Neurosci Res*. 2014;81-82:21-9. Epub 20140127. doi:  
352 10.1016/j.neures.2014.01.005. PubMed PMID: 24480536.
- 353 3. Tóth G, Santa-Maria AR, Herke I, Gáti T, Galvis-Montes D, Walter FR, et al. Highly Oxidized  
354 Ecdysteroids from a Commercial *Cyanotis arachnoidea* Root Extract as Potent Blood–Brain Barrier  
355 Protective Agents. *Journal of Natural Products*. 2023;86(4):1074-80. doi:  
356 10.1021/acs.jnatprod.2c00948.
- 357 4. Chung TD, Linville RM, Guo Z, Ye R, Jha R, Grifno GN, et al. Effects of acute and chronic  
358 oxidative stress on the blood-brain barrier in 2D and 3D in vitro models. *Fluids Barriers CNS*.  
359 2022;19(1):33. Epub 20220512. doi: 10.1186/s12987-022-00327-x. PubMed PMID: 35551622;  
360 PubMed Central PMCID: PMCPMC9097350.
- 361 5. Luceri C, Bigagli E, Femia AP, Caderni G, Giovannelli L, Lodovici M. Aging related changes in  
362 circulating reactive oxygen species (ROS) and protein carbonyls are indicative of liver oxidative injury.  
363 *Toxicol Rep*. 2018;5:141-5. Epub 20171221. doi: 10.1016/j.toxrep.2017.12.017. PubMed PMID:  
364 29854585; PubMed Central PMCID: PMCPMC5977162.
- 365 6. Liguori I, Russo G, Curcio F, Bulli G, Aran L, Della-Morte D, et al. Oxidative stress, aging, and  
366 diseases. *Clin Interv Aging*. 2018;13:757-72. Epub 20180426. doi: 10.2147/CIA.S158513. PubMed  
367 PMID: 29731617; PubMed Central PMCID: PMCPMC5927356.
- 368 7. Song K, Li Y, Zhang H, An N, Wei Y, Wang L, et al. Oxidative Stress-Mediated Blood-Brain  
369 Barrier (BBB) Disruption in Neurological Diseases. *Oxidative Medicine and Cellular Longevity*.  
370 2020;2020:4356386. doi: 10.1155/2020/4356386.
- 371 8. Gorelick-Feldman J, Cohick W, Raskin I. Ecdysteroids elicit a rapid Ca<sup>2+</sup> flux leading to Akt  
372 activation and increased protein synthesis in skeletal muscle cells. *Steroids*. 2010;75(10):632-7. Epub  
373 20100402. doi: 10.1016/j.steroids.2010.03.008. PubMed PMID: 20363237; PubMed Central PMCID:  
374 PMCPMC3815456.
- 375 9. Csábi J, Hsieh TJ, Hasanpour F, Martins A, Kele Z, Gáti T, et al. Oxidized Metabolites of 20-  
376 Hydroxyecdysone and Their Activity on Skeletal Muscle Cells: Preparation of a Pair of Desmotropes  
377 with Opposite Bioactivities. *J Nat Prod*. 2015;78(10):2339-45. Epub 20151014. doi:  
378 10.1021/acs.jnatprod.5b00249. PubMed PMID: 26465254.

- 379 10. Issaadi HM, Csábi J, Hsieh TJ, Gáti T, Tóth G, Hunyadi A. Side-chain cleaved phytoecdysteroid  
380 metabolites as activators of protein kinase B. *Bioorg Chem.* 2019;82:405-13. Epub 20181031. doi:  
381 10.1016/j.bioorg.2018.10.049. PubMed PMID: 30428419.
- 382 11. Bogdán D, Haessner R, Vágvölgyi M, Passarella D, Hunyadi A, Gáti T, et al. Stereochemistry  
383 and complete <sup>1</sup>H and <sup>13</sup>C NMR signal assignment of C-20-oxime derivatives of posterone 2,3-  
384 acetonide in solution state. *Magnetic Resonance in Chemistry.* 2018;56(9):859-66. doi:  
385 <https://doi.org/10.1002/mrc.4750>.
- 386 12. Issaadi HM, Csabi J, Hsieh TJ, Gati T, Toth G, Hunyadi A. Side-chain cleaved phytoecdysteroid  
387 metabolites as activators of protein kinase B. *Bioorg Chem.* 2019;82:405-13. Epub 2018/11/15. doi:  
388 10.1016/j.bioorg.2018.10.049. PubMed PMID: 30428419.
- 389 13. Vagvolgyi M, Martins A, Kulmany A, Zupko I, Gati T, Simon A, et al. Nitrogen-containing  
390 ecdysteroid derivatives vs. multi-drug resistance in cancer: Preparation and antitumor activity of  
391 oximes, oxime ethers and a lactam. *Eur J Med Chem.* 2018;144:730-9. Epub 2018/01/02. doi:  
392 10.1016/j.ejmech.2017.12.032. PubMed PMID: 29291440.
- 393 14. Duddeck H, Dietrich W, Tóth G. *Structure Elucidation by Modern NMR1998.*
- 394 15. Pretsch E, Tóth G, Munk EM, Badertscher M. *Computer-Aided Structure Elucidation: Wiley-*  
395 *VCH; 2002.*
- 396 16. Vágvölgyi M, Martins A, Kulmány Á, Zupkó I, Gáti T, Simon A, et al. Nitrogen-containing  
397 ecdysteroid derivatives vs. multi-drug resistance in cancer: Preparation and antitumor activity of  
398 oximes, oxime ethers and a lactam. *Eur J Med Chem.* 2018;144:730-9. Epub 20171212. doi:  
399 10.1016/j.ejmech.2017.12.032. PubMed PMID: 29291440.
- 400 17. Obermeier B, Daneman R, Ransohoff RM. Development, maintenance and disruption of the  
401 blood-brain barrier. *Nat Med.* 2013;19(12):1584-96. Epub 20131205. doi: 10.1038/nm.3407. PubMed  
402 PMID: 24309662; PubMed Central PMCID: PMC4080800.
- 403 18. Kucera O, Endlicher R, Rousar T, Lotkova H, Garnol T, Drahotka Z, et al. The effect of tert-butyl  
404 hydroperoxide-induced oxidative stress on lean and steatotic rat hepatocytes in vitro. *Oxid Med Cell*  
405 *Longev.* 2014;2014:752506. Epub 20140331. doi: 10.1155/2014/752506. PubMed PMID: 24847414;  
406 PubMed Central PMCID: PMC4009166.
- 407 19. Harazin A, Bocsik A, Barna L, Kincses A, Varadi J, Fenyvesi F, et al. Protection of cultured brain  
408 endothelial cells from cytokine-induced damage by alpha-melanocyte stimulating hormone. *PeerJ.*  
409 2018;6:e4774. Epub 20180515. doi: 10.7717/peerj.4774. PubMed PMID: 29780671; PubMed Central  
410 PMCID: PMC5958884.
- 411 20. Santa-Maria AR, Walter FR, Valkai S, Bras AR, Meszaros M, Kincses A, et al. Lidocaine turns  
412 the surface charge of biological membranes more positive and changes the permeability of blood-  
413 brain barrier culture models. *Biochim Biophys Acta Biomembr.* 2019;1861(9):1579-91. Epub  
414 20190710. doi: 10.1016/j.bbamem.2019.07.008. PubMed PMID: 31301276.
- 415 21. Hunyadi A, Herke I, Lengyel K, Bathori M, Kele Z, Simon A, et al. Ecdysteroid-containing food  
416 supplements from *Cyanotis arachnoidea* on the European market: evidence for spinach product  
417 counterfeiting. *Sci Rep.* 2016;6:37322. Epub 2016/12/09. doi: 10.1038/srep37322. PubMed PMID:  
418 27929032; PubMed Central PMCID: PMC45144001.
- 419 22. Issaadi HM, Tsai Y-C, Chang F-R, Hunyadi A. Centrifugal partition chromatography in the  
420 isolation of minor ecdysteroids from *Cyanotis arachnoidea*. *Journal of Chromatography B.*  
421 2017;1054:44-9. doi: <https://doi.org/10.1016/j.jchromb.2017.03.043>.
- 422 23. Weksler BB, Subileau EA, Perriere N, Charneau P, Holloway K, Leveque M, et al. Blood-brain  
423 barrier-specific properties of a human adult brain endothelial cell line. *FASEB J.* 2005;19(13):1872-4.  
424 Epub 20050901. doi: 10.1096/fj.04-3458fje. PubMed PMID: 16141364.
- 425 24. Veszélka S, Toth A, Walter FR, Toth AE, Grof I, Meszaros M, et al. Comparison of a Rat  
426 Primary Cell-Based Blood-Brain Barrier Model With Epithelial and Brain Endothelial Cell Lines: Gene  
427 Expression and Drug Transport. *Front Mol Neurosci.* 2018;11:166. Epub 20180522. doi:  
428 10.3389/fnmol.2018.00166. PubMed PMID: 29872378; PubMed Central PMCID: PMC5972182.

- 429 25. Walter FR, Veszelka S, Pasztoi M, Peterfi ZA, Toth A, Rakhely G, et al. Tesimalifene modifies  
430 brain endothelial functions and opens the blood-brain/blood-glioma barrier. *J Neurochem.*  
431 2015;134(6):1040-54. Epub 20150723. doi: 10.1111/jnc.13207. PubMed PMID: 26112237.  
432 26. Martin C, Martinez R, Navarro R, Ruiz-Sanz JI, Lacort M, Ruiz-Larrea MB. tert-Butyl  
433 hydroperoxide-induced lipid signaling in hepatocytes: involvement of glutathione and free radicals.  
434 *Biochem Pharmacol.* 2001;62(6):705-12. doi: 10.1016/s0006-2952(01)00704-3. PubMed PMID:  
435 11551515.  
436 27. Zhao W, Feng H, Sun W, Liu K, Lu JJ, Chen X. Tert-butyl hydroperoxide (t-BHP) induced  
437 apoptosis and necroptosis in endothelial cells: Roles of NOX4 and mitochondrion. *Redox Biol.*  
438 2017;11:524-34. Epub 20170105. doi: 10.1016/j.redox.2016.12.036. PubMed PMID: 28088644;  
439 PubMed Central PMCID: PMC5237803.

440

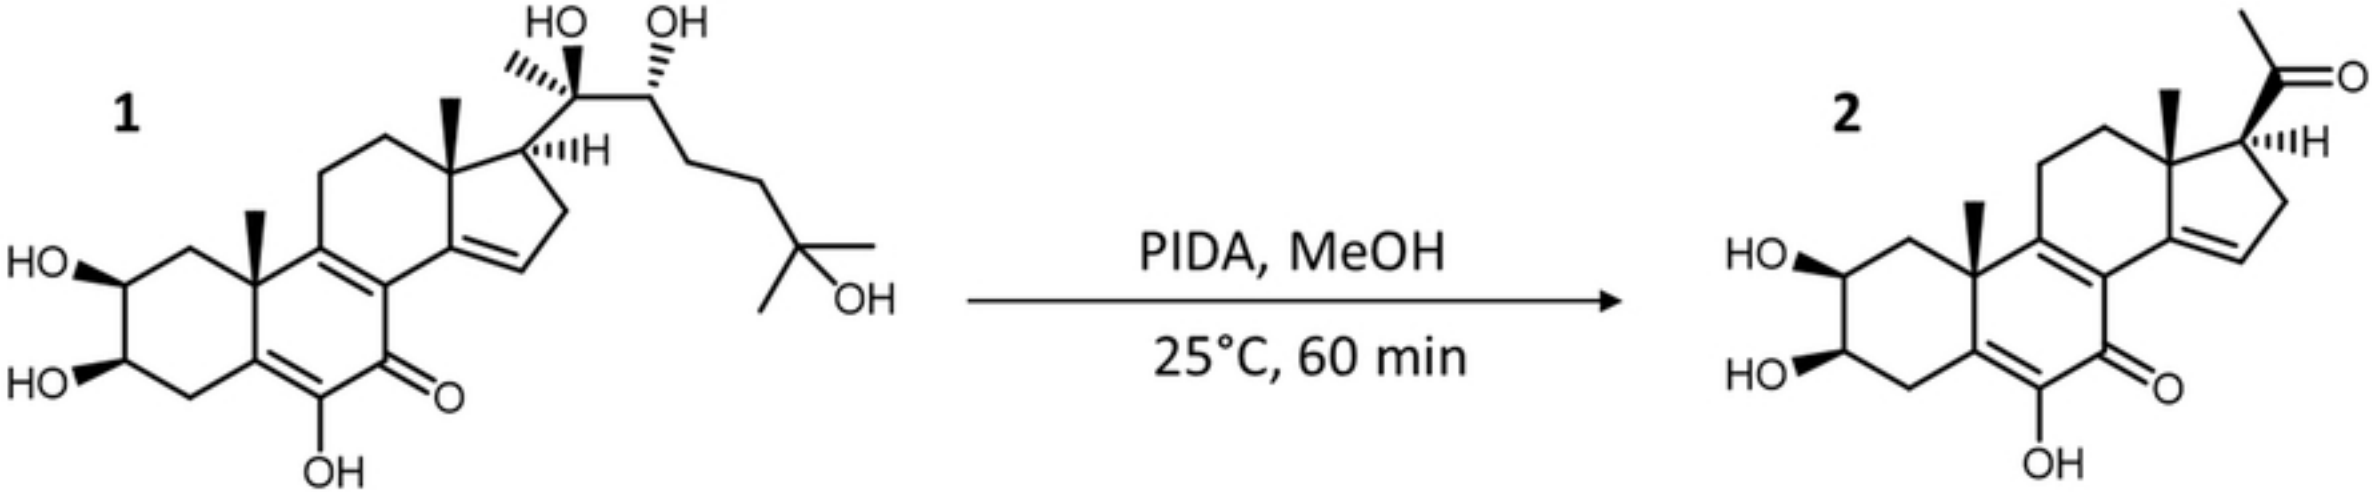

Figure 1

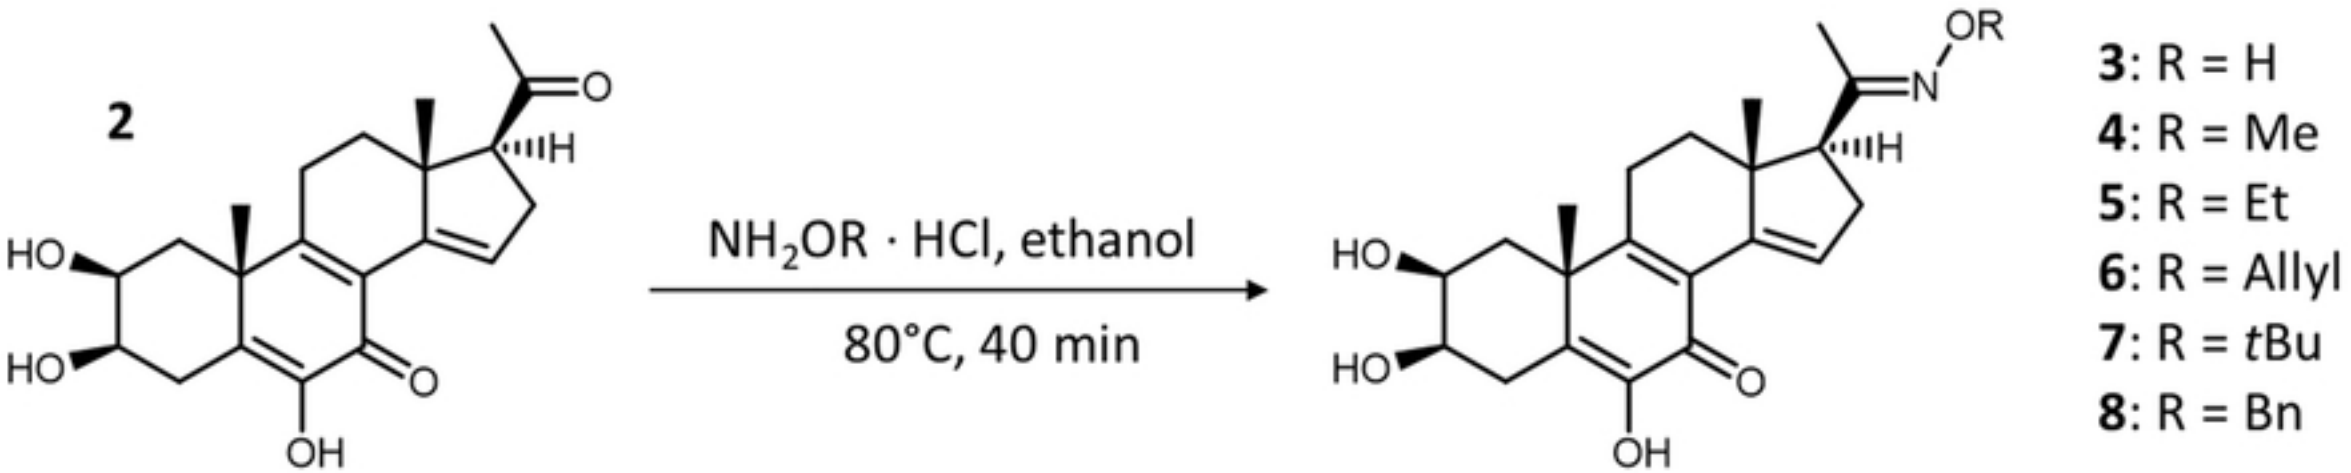

Figure 2

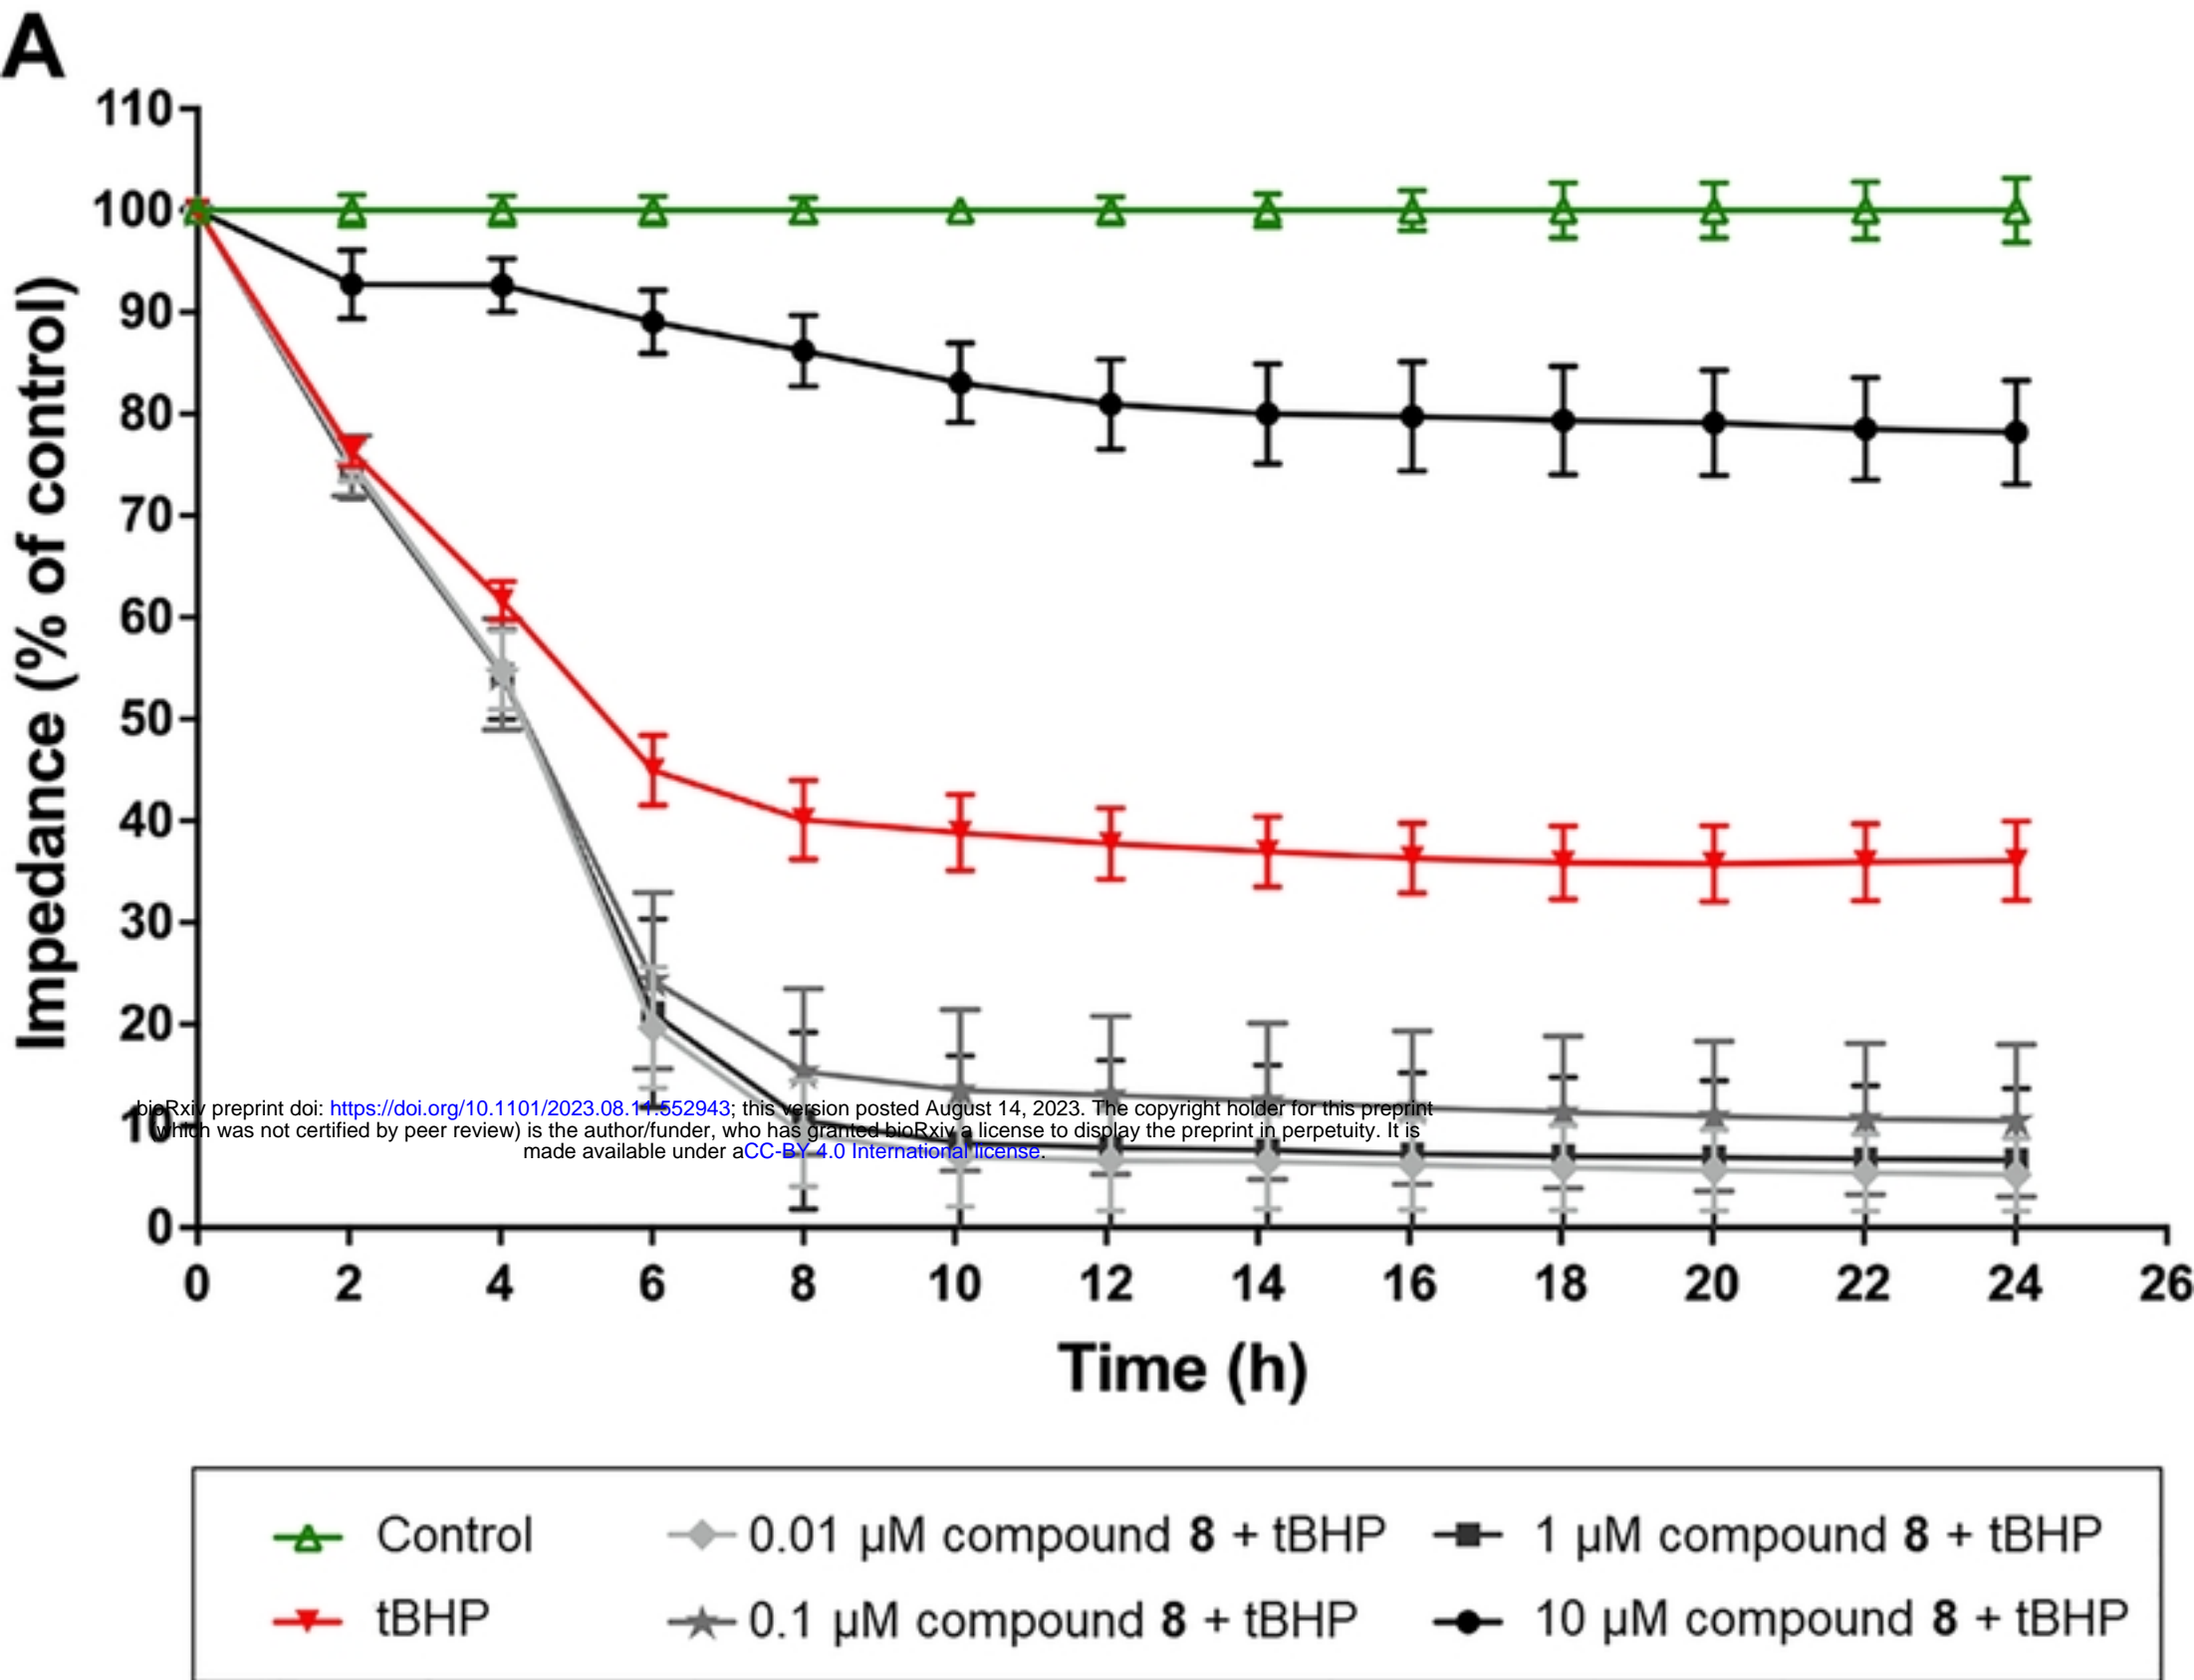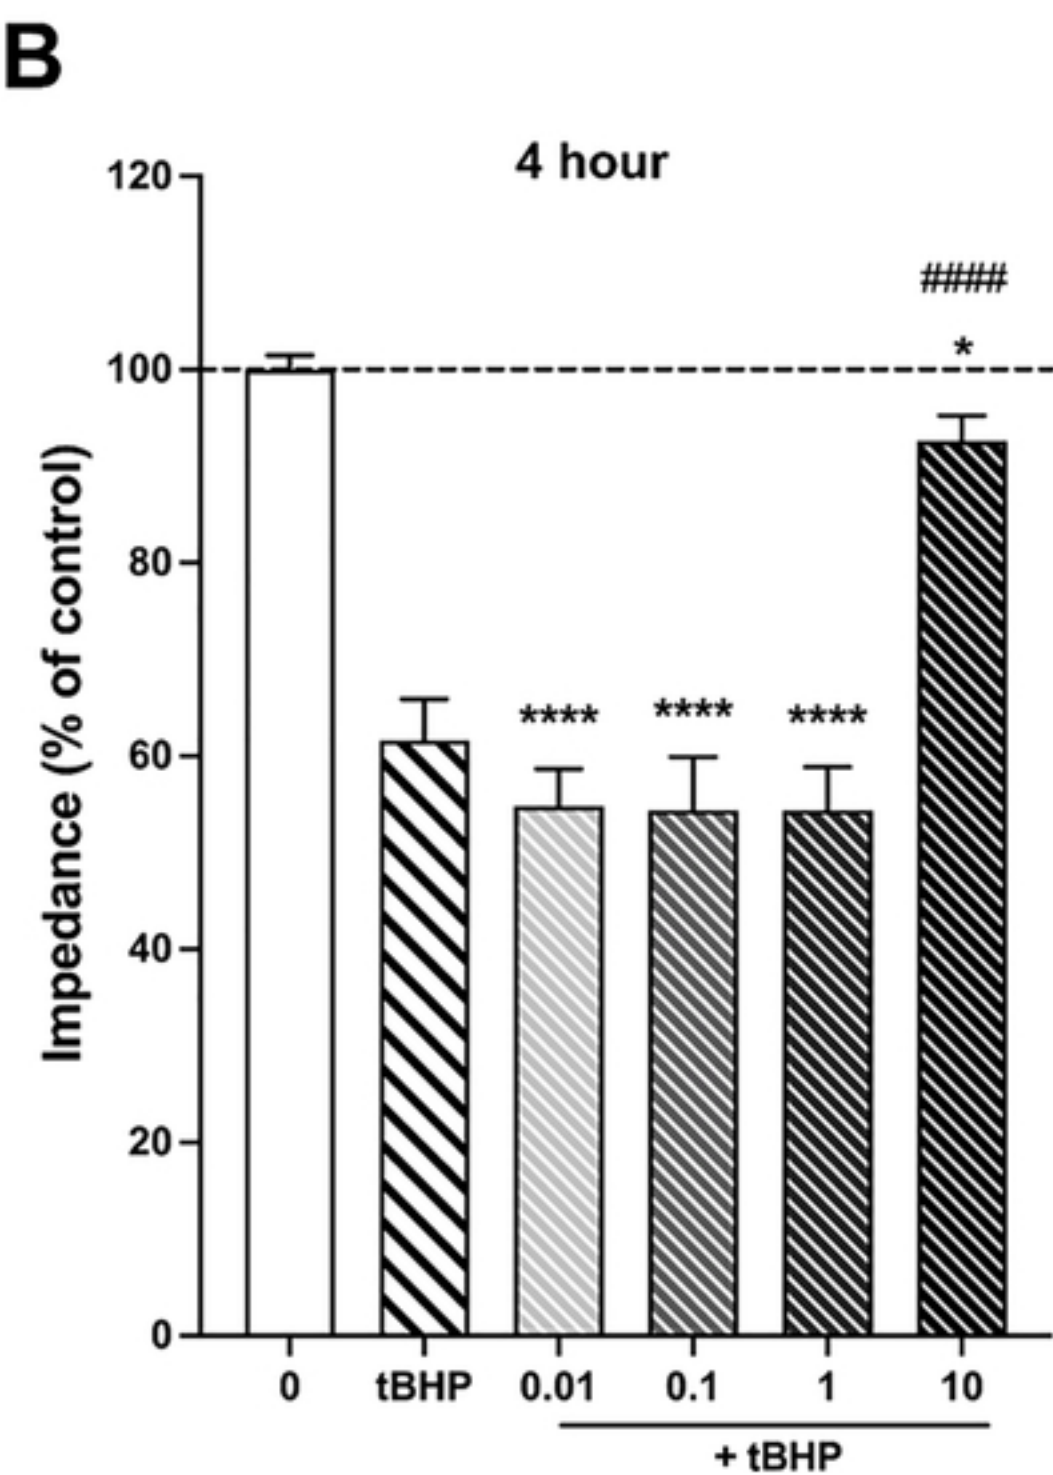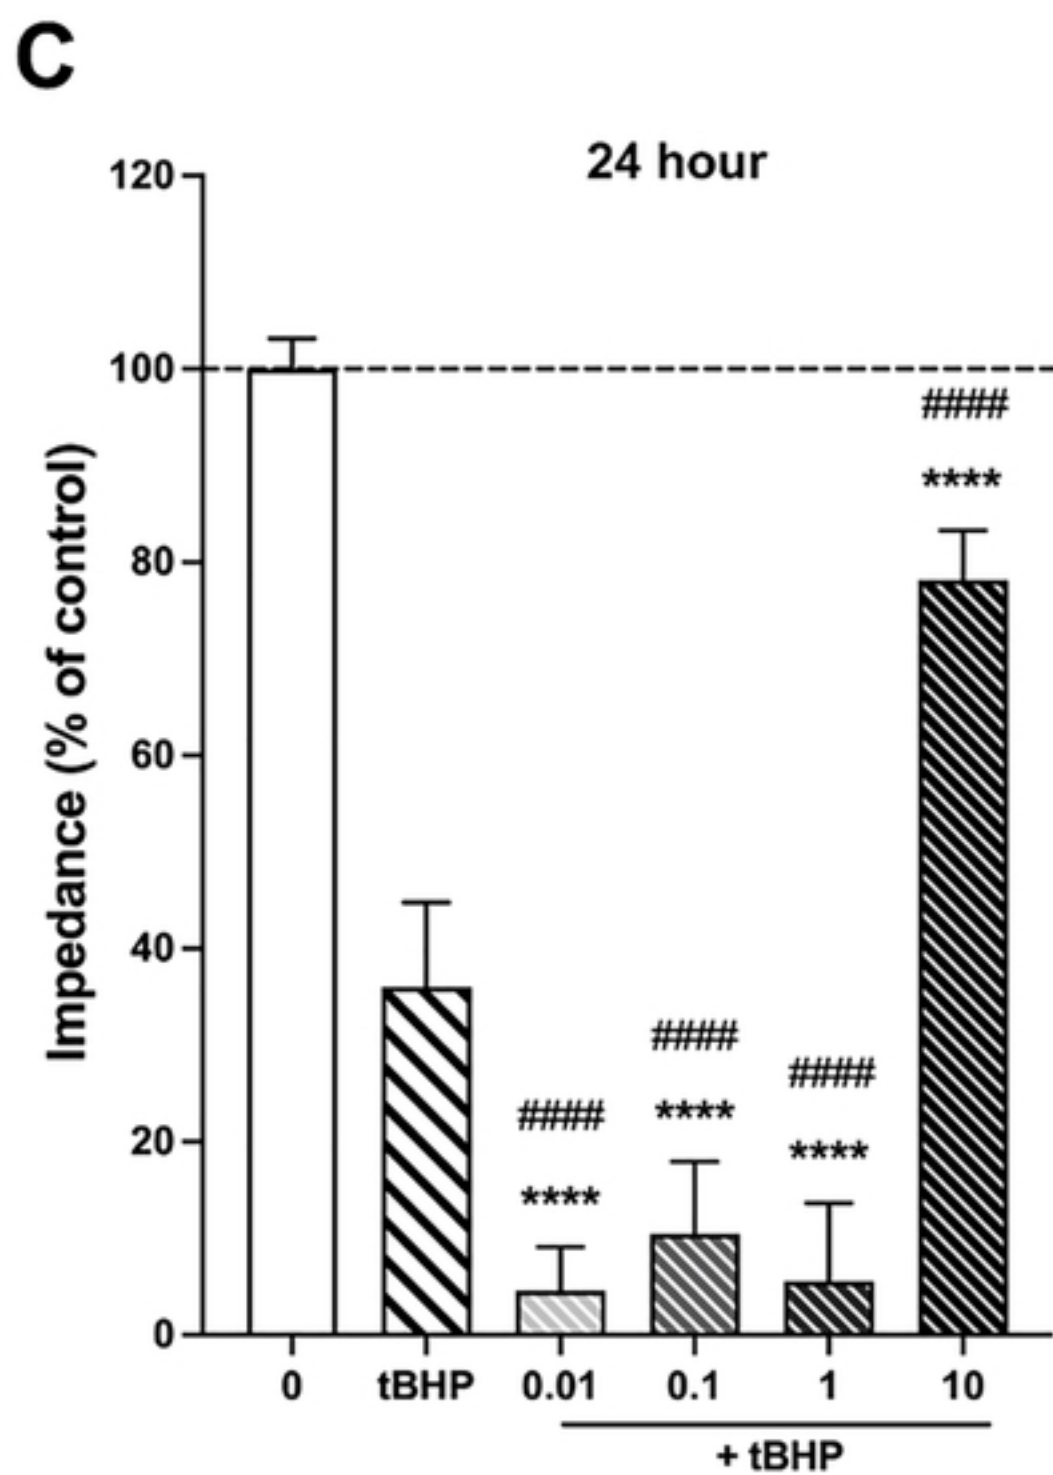

Figure 3
